# Supplementary material for: Gibberellin Promotes Sweetpotato Root Vascular Lignification and Reduces Storage-Root Formation
Source: PubMed Central journal article supplement (PMC6897044; doi:10.3389/fpls.2019.01320), 2019-11-15
Supplement: Table_1.pdf [file Table_1.pdf]

**SUPPLEMENTARY TABLE S1.** Primers used for gene expression analysis by qRT-PCR.

| <i>Ipomoea batata</i> contigs | <i>Ipomoea batata</i> gene name                                   | Forward primer             | Reverse Primer          |
|-------------------------------|-------------------------------------------------------------------|----------------------------|-------------------------|
| S_PBL_c17751                  | Kurene oxidase ( <i>IbKO</i> )                                    | GCATAGGAAAAGGCAGTGAGA      | CGAGAGCAACCACCAAACC     |
| S_PBL_c36353                  | Gibberellin 20-dioxygenase ( <i>IbGA2Oox</i> )                    | TTTACAGCCCCTTTGTTTGC       | GGCCAGCATAATCTTTAACTGTG |
| S_PBL_c51845                  | Gibberellin 3-beta-dioxygenase 4 ( <i>IbGA3ox4</i> )              | GAGCCCAACCTAGTGAAACAA      | CCAGGACAGGGAGTTGTATAGG  |
| S_PBL_c23111                  | Gibberellin 2-oxidase1 ( <i>IbGA2ox1</i> )                        | AACGTCGGAGATTCTCTTCAGG     | TGACAGCCTCGATTTTGCAC    |
| S_PBL_c32                     | Gibberellin 2-oxidase 3 ( <i>IbGA2ox3</i> )                       | CATATCCATAGCTCCCCACAA      | CTGGGTGCTAGGGGAGATAGA   |
| S_PBL_c13427                  | Gibberellin 2-oxidase8 ( <i>IbGA2ox8</i> )                        | GTGGGGAAGGCAATATACGA       | CGAGGGTATCGATATACACGTAA |
| S_PBL_c19593                  | Gibberellin insensitive dwarf1 ( <i>IbGID1</i> )                  | TCCGGCTTAAGGAGGAAGTA       | ACATCATGGATTTCCCAAAA    |
| S_PBL_c1873                   | GA-insensitive ( <i>IbGAI/RGA2</i> ) / DELLA protein              | ATTCTCCCCGGTTCACTTG        | CGTCGTTCTCCTCCACTCTG    |
| S_PBL_c36855                  | VASCULAR RELATED NAC-DOMAIN PROTEIN 075 ( <i>IbNAC075</i> )       | AAGAGCATCAGCTGTGTGGA       | CAATTCTTGATCTGTTGGGTCA  |
| S_PBL_c32341                  | VASCULAR RELATED NAC-DOMAIN PROTEIN 7 ( <i>IbVND7</i> )           | TAGAATGGAGCCATGGGACA       | AGTTCCCGTCGGATACTTCC    |
| S_PBL_c24252                  | SECONDARY WALL-ASSOCIATED NAC DOMAIN 2 ( <i>IbSND2</i> )          | GCCTGGTCTACCCGCCG          | AGGATGAAGTTTCCGGCTGT    |
| S_PBL_c504                    | XYLEM NAC DOMAIN1 ( <i>IbXND1</i> )                               | ACGCTTTTTACGTCGGAGAG       | TGGAAGCGGAATAATCGGAGAG  |
| S_PBL_c4628                   | VND-INTERACTING2 ( <i>IbVNI2</i> )                                | ACCATAACCATAACCATCTTC      | AACTCAACTTCTCCATAACCACC |
| S_PBL_c17476                  | VND-INTERACTING2-like ( <i>IbVNI2-like</i> )                      | ACCCTAGCTCAGGCTCAGAC       | CCCTCGCCAAGAAGTCGTAG    |
| S_PBL_c2312                   | Phenylalanine ammonia lyase ( <i>IbPAL</i> )                      | GGATCCAAGAGTGCAGGTCC       | CCTTGTCACATTCTCCCCG     |
| S_PBL_c7605                   | Cinnamate 4-hydroxylase ( <i>IbC4H</i> )                          | GCGGCAAGAAGTACAAGCTC       | CTTGGCGTAATCGGTGAGAT    |
| S_PBL_c18044                  | 4-Coumarate-CoA ligase ( <i>Ib4CL</i> )                           | CTGAGGATGAAGTTAAAGAGTTTGTG | GCCTGAGGGAGACTTTGGA     |
| S_PBL_c17752                  | Hydroxycinnamoyl transferase ( <i>IbHCT</i> )                     | CCGTCGCTTACAGCTCCTAC       | CGGTGGCTATGTACAGCTTG    |
| S_PBL_c2944                   | Caffeoyl-CoA-O-methyltransferase ( <i>IbCCoAOMT</i> )             | GAGGCACCCACAAGACTACG       | TGGTTGTCTGATTCTCCGCC    |
| S_PBL_lrc53688                | Cinnamyl alcohol dehydrogenase ( <i>IbCAD</i> )                   | GTCTTGGCGCAGACTCTTTC       | TAATGGCACAACAGCGTGAT    |
| S_PBL_c8137                   | Class I knotted 1-like homeobox ( <i>KNOX1</i> ) ( <i>IbKN2</i> ) | GCCAGGCAGAAGTTGCTTAG       | CAGTGCCGTTTTCTTTGGTT    |
| S_PBL_c31412                  | Class I knotted 1-like homeobox ( <i>KNOX1</i> ) ( <i>IbKN3</i> ) | CGCCTAGGTCCATAATCC         | TATTTCAAGGCGGTCTCA      |
| S_PBL_c543                    | Sucrose synthase ( <i>IbSuSy</i> )                                | TACTGCATCCTTTCCCAAGC       | AGCCATGCTCTCCTTGTCAT    |
| S_PBL_c20112                  | Phosphoglucomutase ( <i>IbPGM</i> )                               | TGAGAAGGATGCTTCCAAGA       | GCCAGTGAATTCCTGCATCT    |
| S_PBL_c18129                  | ADP-glucose pyrophosphorylase alpha subunit ( <i>IbAGPa1</i> )    | CAATTGGAATTGGCAGGAAT       | TTTCCCTAGCTGCTTCTTGAAC  |
| S_PBL_c54187                  | ADP-glucose pyrophosphorylase beta subunit ( <i>IbAGPb1A</i> )    | GATTGGGTAAAGACGTTGTCATC    | CACGAATGGTTGCTTTCTCC    |
| S_PBL_c3042                   | Granule-bound starch synthase ( <i>IbGBSS</i> )                   | GGACGTGCTGAAGGTGATAA       | CGAGAGCTCTGTGACATGC     |
| S_PBL_c1370                   | Starch phosphorylase ( <i>IbSP</i> )                              | GTGTGACACCAAGAAGATGGA      | CGCAGTTCTGCCAACTTTTC    |
| JX177360.1                    | Phospholipase D1a ( <i>IbPLD</i> )                                | ATCGGAATCAGCAGTGATGG       | ATGATGAGGCAAGCAGTGTG    |
